# Supplementary material for: Genetic trade‐offs between complex diseases and longevity
Source: PubMed Central journal article supplement (PMC9282840; doi:10.1111/acel.13654), 2022-06-26

Set Adrenal Cardiovascular CNS Connective\_Bone GI Immune Kidney Liver Other SkeletalMuscle

CAD

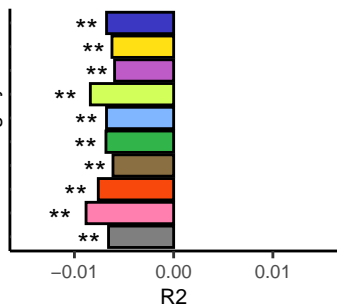

SCZ

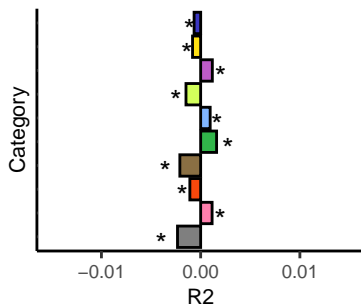

T2D

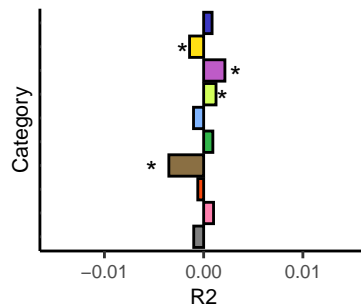

Height

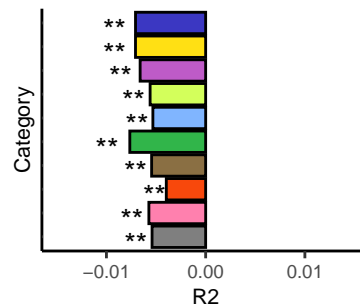

insulin\_CIR

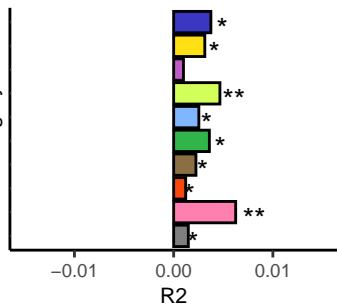

AS

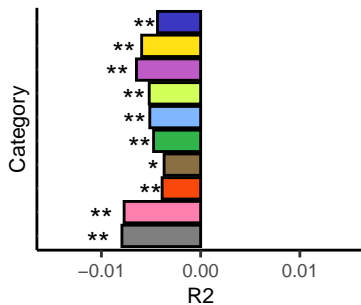

AIS

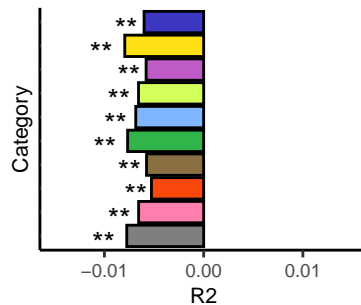

Bis.FA.ratio

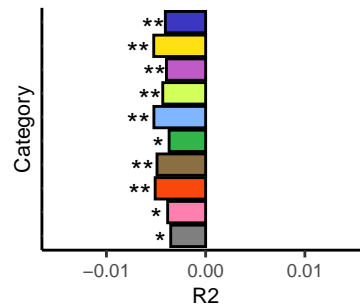

CH2.DB.ratio

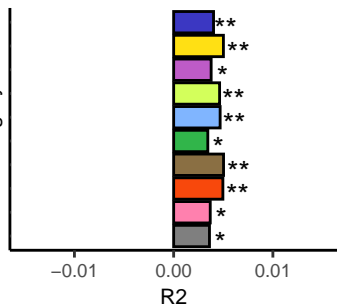

DB.in.FA

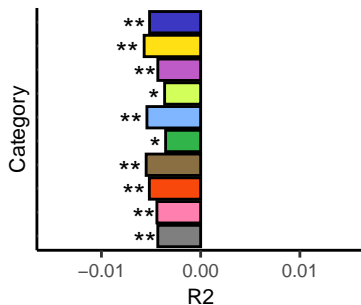

otPUFA

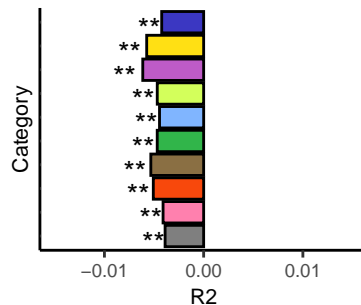

S.VLDL.C

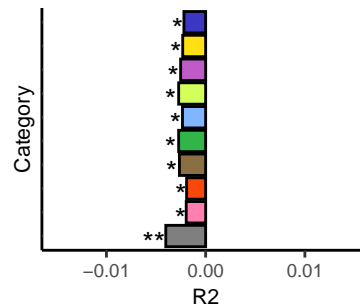

S.VLDL.FC

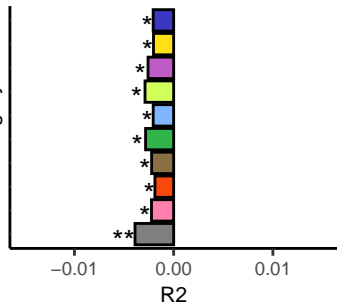

DBP

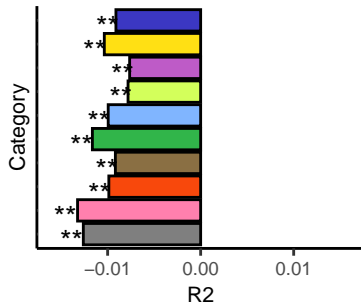

SBP

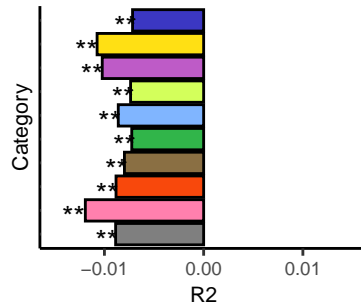

FAw3

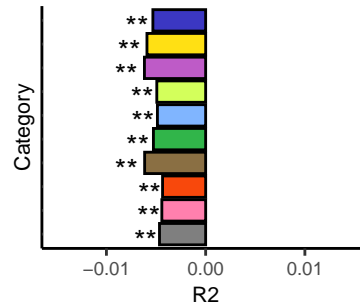

Supplement: ACEL-21-e13654-s005.pdf [file ACEL-21-e13654-s005.pdf]
