# Supplementary material for: Genetic trade‐offs between complex diseases and longevity
Source: PubMed Central journal article supplement (PMC9282840; doi:10.1111/acel.13654), 2022-06-26

# Correlations between PRS of complex traits and longevity

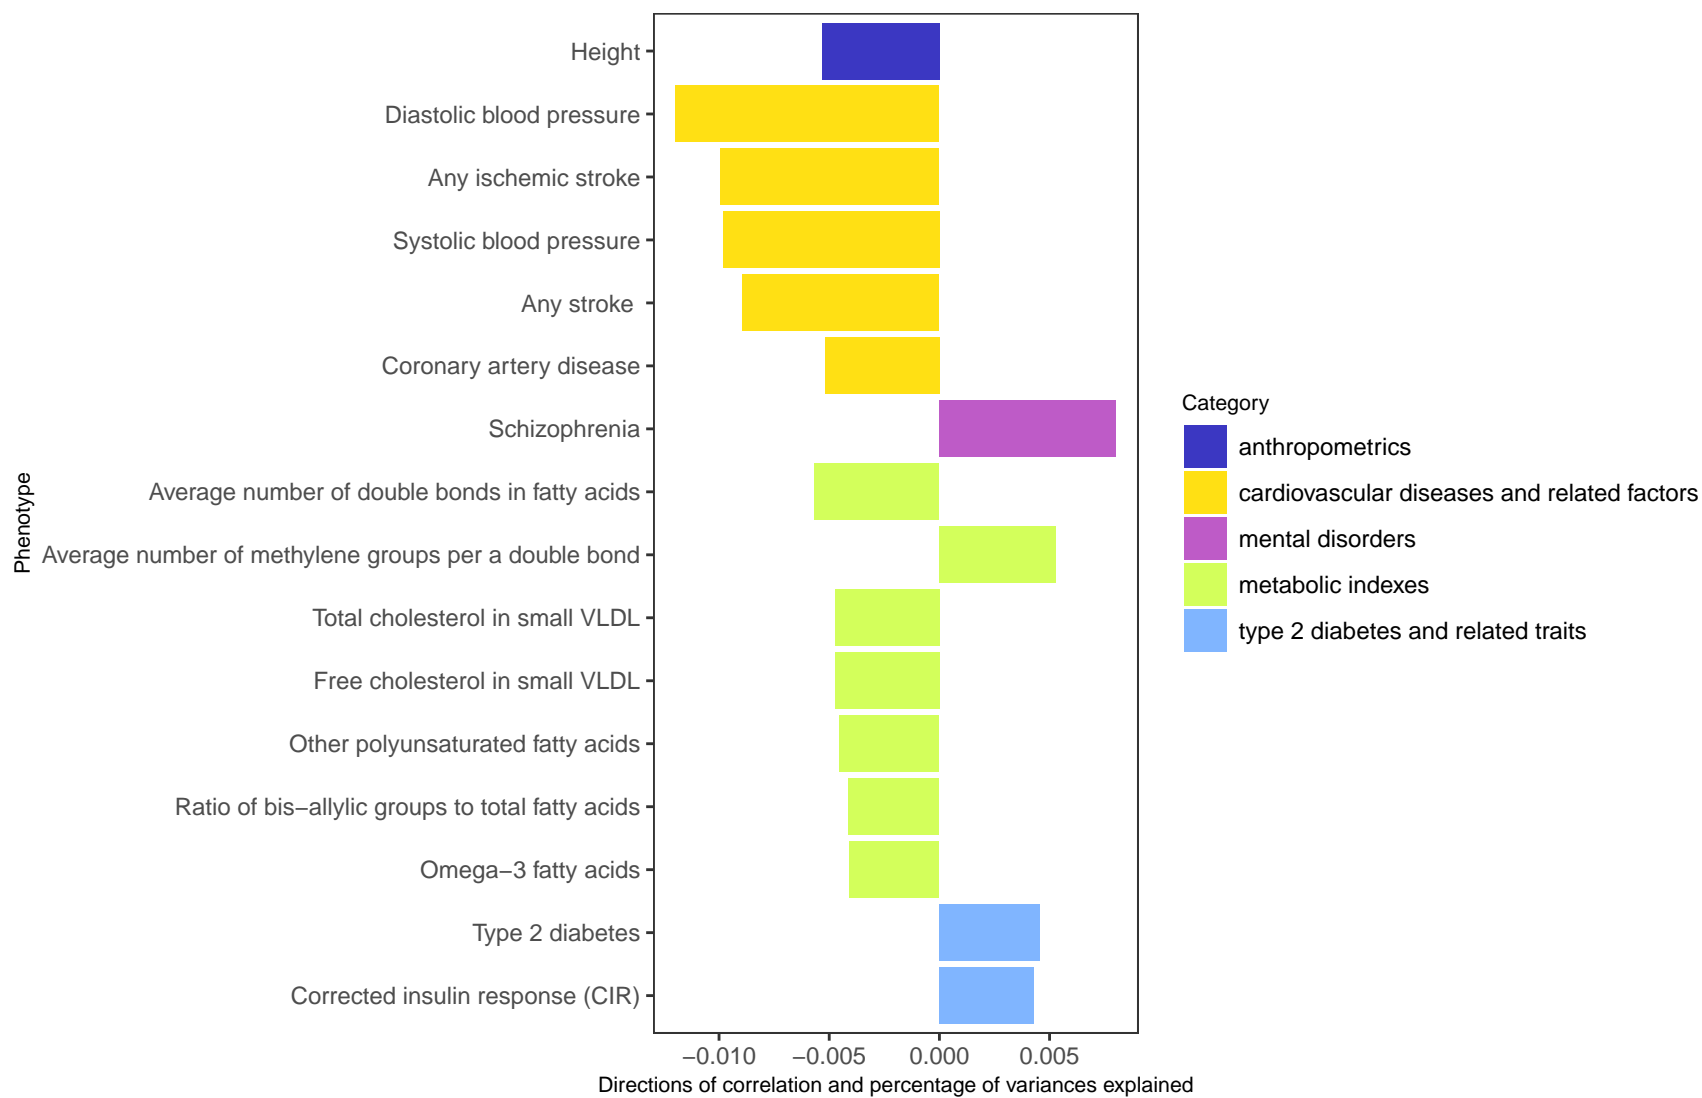

Supplement: ACEL-21-e13654-s001.pdf [file ACEL-21-e13654-s001.pdf]
